# Supplementary material for: miR-205 Regulates the Fusion of Porcine Myoblast by Targeting the Myomaker Gene
Source: MDPI journal article supplement (doi:10.3390/cells12081107), 2023-04-07
Supplement: s1 [file s1]

Table S4. Gene-specific primers used for qRT-PCR and 3' RACE

| Gene name                       | Sequence (5' to 3')                                    | TM/°C    |
|---------------------------------|--------------------------------------------------------|----------|
| <i>Myomaker</i>                 | F-TGATGTTTGGCGTCCTGACC<br>R-AAGAAAAAAGCGCAGCATGAGG     | 61.4     |
| <i>MyoG</i>                     | F-AGGCTACGAGCGGACTGAG<br>R-GCAGGGTGCTCCTCTTCAG         | 62.5     |
| <i>MyoD</i>                     | F-AAGTCAACGAGGCCTTCGAG<br>R-GGGGGCCGCTATAATCCATC       | 53.7     |
| <i>Myf5</i>                     | F-GATCAGCAACTCCGAGCAAC<br>R-ATGAGCCTGGAAGTAGACGC       | 53.7     |
| <i>Pax7</i>                     | F-CAGTGAGTTCGATTAGCCGC<br>R-AGATCGGGTTCTGACTCCAC       | 58       |
| <i>MyH1</i>                     | F-GCACCGTGGACTACAACATC<br>R-TGAGCAGCTTGAGAGAGGAC       |          |
| <i>MyH2a</i>                    | F-GGAGATCGACGACCTTGCTA<br>R-CTCCTTGGATTTCAGCTCGC       | 56.5     |
| <i>MyH2b</i>                    | F-CTGAAGGACACTCAGCTCCA<br>R-GCTCTTCAATCTCAGCCTGC       |          |
| <i>MyH2x</i>                    | F-TGAGGAAGCGGAGGAACAAT<br>R-TGAACCTCCCGACTCTTGAC       |          |
| <i>GAPDH</i>                    | F- CCCCTTCATTGACCTCCACT<br>R- CCATTTGATGTTGGCGGGAT     | 59.4     |
| <i>β-Actin</i>                  | F-TCTGGCACCACACCTTCT<br>R-TGATCTGGGTCATCTTCTCAC        |          |
| 3' RACE Oligo(dT)-anchor primer | GCTGTCAACGATACGCTACGTAAC<br>GGCATGACAGTGTTTTTTTTTTTTTT |          |
| 3' Myomaker specific primer     | TACACACAGCAGATAGGCCC                                   | 66,68,70 |
| 3' adaptor outer primer         | TACCGTCGTTCCACTAGTGATT                                 |          |
| ssc-miR-491                     | AGTGGGGAACCCTTCCATGAGG                                 |          |
| ssc-miR-205                     | TCCTTCATTCCACCGGAGTCTG                                 |          |
| ssc-miR-30b-3p                  | CTGGGAGGTGGATGTTTACTT                                  |          |
| ssc-miR-30c-3p                  | CTGGGAGAAGGCTGTTTACTCT                                 |          |
| ssc-mir-92b-5p                  | AGGGACGGGACGCGGTGCAGTGTT                               |          |
| ssc-miR-365-5p                  | GAGGGACTTTCAGGGGCAGCTGT                                | 60       |
| ssc-miR-542-5p                  | TCGGGGATCATGTACGA                                      |          |
| ssc-miR-582-3p                  | TAACCGGTTGAACAACCTGAACC                                |          |
| Uni-miR qPCR primer             | included in kit                                        |          |
| <i>U6</i>                       | F-CTCGCTTCGGCAGCACA<br>R-AACGCTTCACGAATTTGCGT          |          |
