# Supplementary material for: miR-205 Regulates the Fusion of Porcine Myoblast by Targeting the Myomaker Gene
Source: MDPI journal article supplement (doi:10.3390/cells12081107), 2023-04-07
Supplement: s1 [file s1]

Table S1. MiRNAs studied and correlation analysis of miRNAs and Myomaker gene

| miR-name       | primer (5' to 3')        | correlation ( <i>r</i> ) |
|----------------|--------------------------|--------------------------|
| ssc-miR-491    | AGTGGGGAACCCCTCCATGAGG   | -0.084                   |
| ssc-miR-205    | TCCTTCATTCCACCGGAGTCTG   | -0.538                   |
| ssc-miR-30b-3p | CTGGGAGGTGGATGTTTACTT    | -0.181                   |
| ssc-miR-30c-3p | CTGGGAGAAGGCTGTTTACTCT   | -0.007                   |
| ssc-miR-92b-5p | AGGGACGGGACGCGGTGCAGTGTT | 0.066                    |
| ssc-miR-365-5p | GAGGGACTTTCAGGGGCAGCTGT  | 0.065                    |
| ssc-miR-542-5p | TCGGGGATCATGTCACGA       | 0.175                    |
| ssc-miR-582-3p | TAACCGGTTGAACAACCTGAACC  | 0.111                    |
