# Supplementary material for: miR-205 Regulates the Fusion of Porcine Myoblast by Targeting the Myomaker Gene
Source: MDPI journal article supplement (doi:10.3390/cells12081107), 2023-04-07
Supplement: s1 [file s1]

Table S2. Prediction of binding sites of miRNAs and 3' UTR of Myomaker

| miR-name       | binding sites (3' to 5') | minimal free energy (kcal/mol) |
|----------------|--------------------------|--------------------------------|
| ssc-miR-491    | GGGGUG                   | -27.6                          |
| ssc-miR-205    | ACUUCCU                  | -27.7                          |
| ssc-miR-30b-3p | GGGU                     | -26.5                          |
| ssc-miR-30c-3p | GAGGGUC                  | -23.5                          |
