# Supplementary material for: miR-205 Regulates the Fusion of Porcine Myoblast by Targeting the Myomaker Gene
Source: MDPI journal article supplement (doi:10.3390/cells12081107), 2023-04-07
Supplement: s1 [file s1]

Table S3. Validation reporting for miR-205-Myomaker interaction

|   |                                                     |                                                  |                                       |
|---|-----------------------------------------------------|--------------------------------------------------|---------------------------------------|
| 1 | Gene                                                | Gene name<br>Entrez ID                           | Myomaker (Tmem8c)<br>100627299        |
| 2 | Target miRNA                                        | Gene name<br>Entrez ID                           | miR-205<br>100316607                  |
| 3 | Species                                             | Species<br>Species ID                            | Sus scrofa<br>9823                    |
| 4 | Experimental validation of miRNA–target interaction | Sequence of the target region, 5'-3'             | TGAAGG                                |
|   |                                                     | Genomic location of 3'UTR                        | 213-218                               |
|   |                                                     | Method for experimental validation               | luciferase reporter assay, qPCR       |
|   |                                                     | Tissue, cells                                    | longissimus dorsi, primary MSCs       |
| 5 | Sequence variant                                    | rs number (synonym)                              | na                                    |
| 6 | Associated disease or phenotype                     | As named in the reference<br>DOID (if available) | muscular dystrophy, sarcopenia,<br>na |
| 7 | Reference                                           | Author, year<br>PMID                             | na<br>na                              |

---
